# Supplementary figures and images for: The blue shift of fluorescence emission reveals the dsRNA-loading capacity of cationic nanocarriers
Source: Royal Society of Chemistry journal article supplement (doi:10.1039/d4tb01393j), 2024-01-01

**a)**

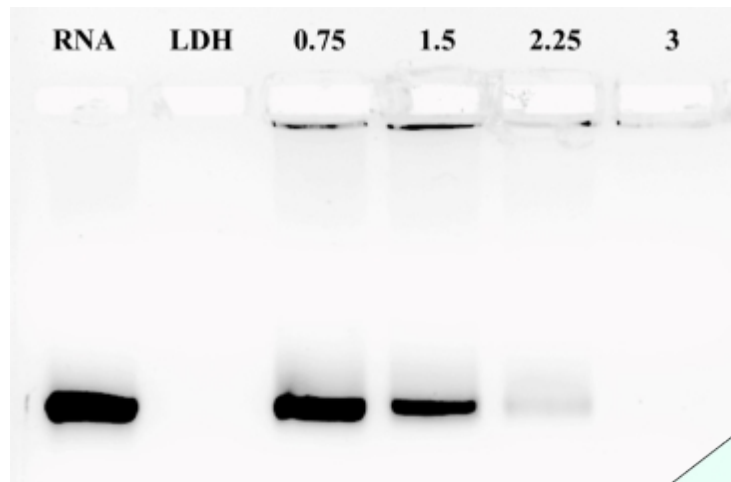

**b)**

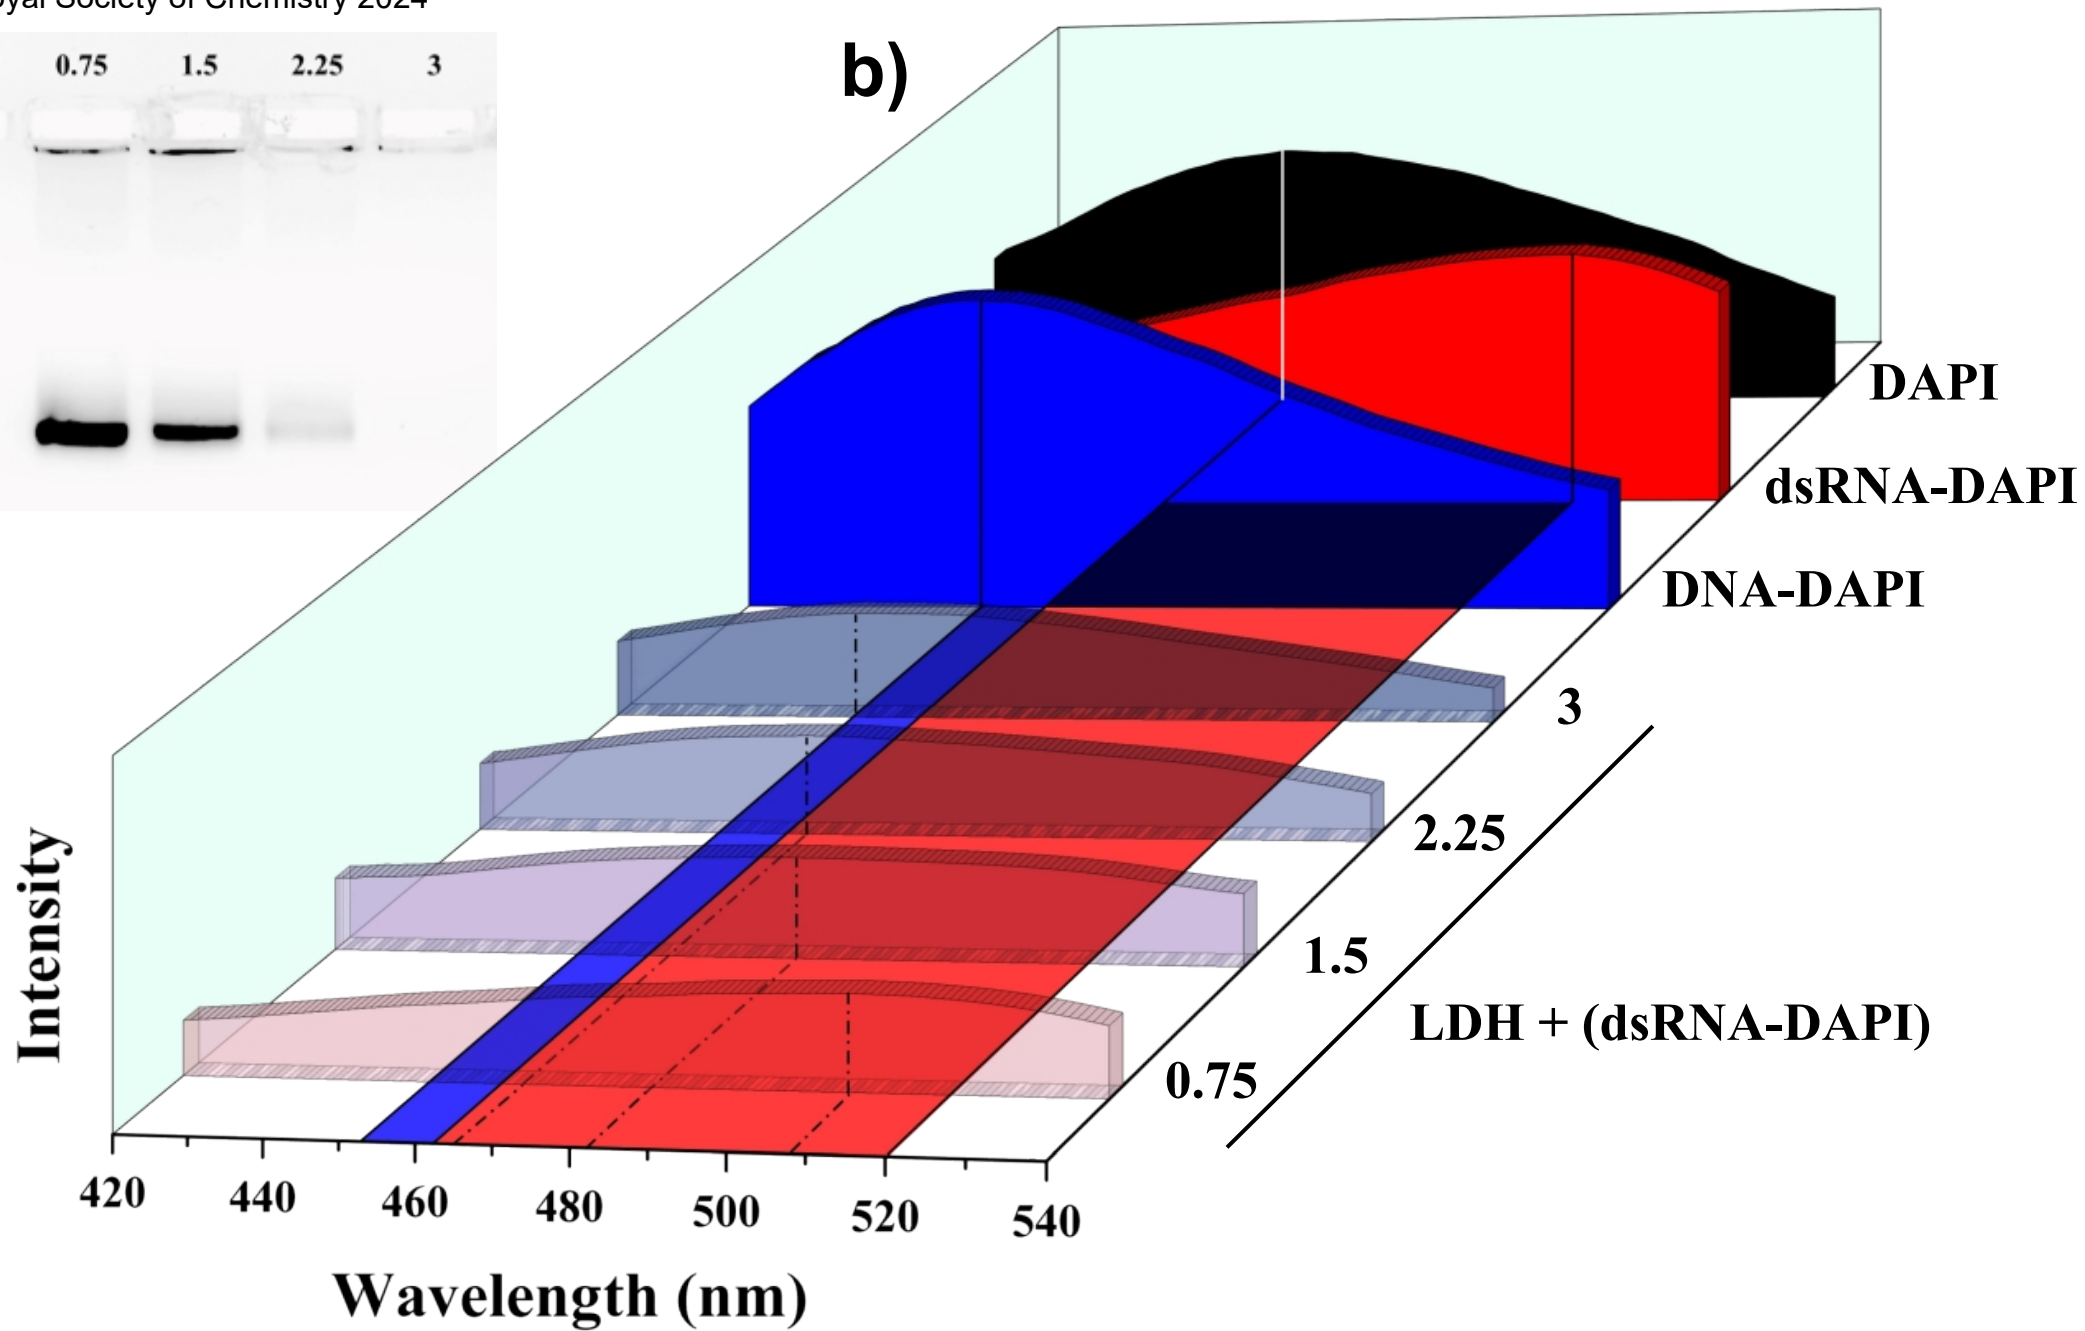

**LDH**

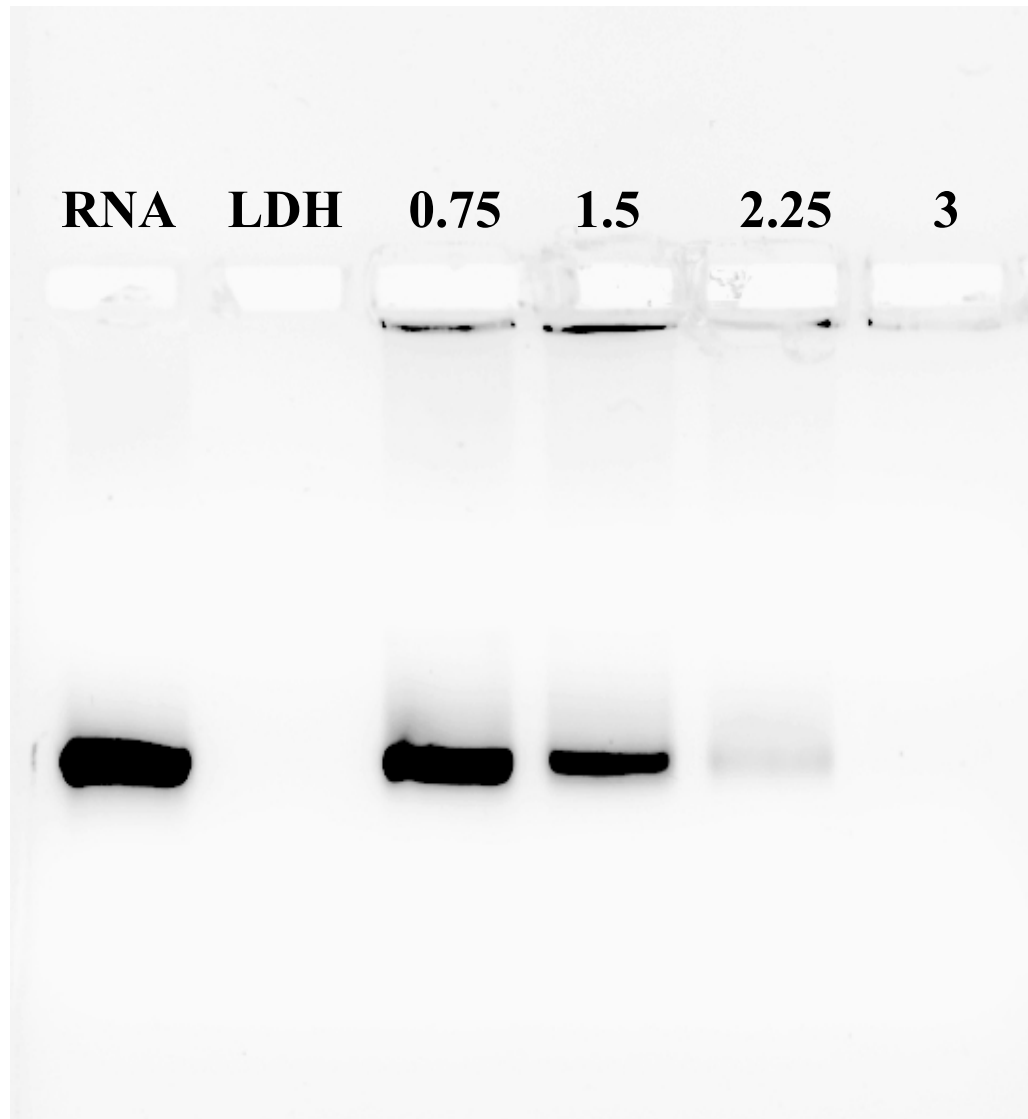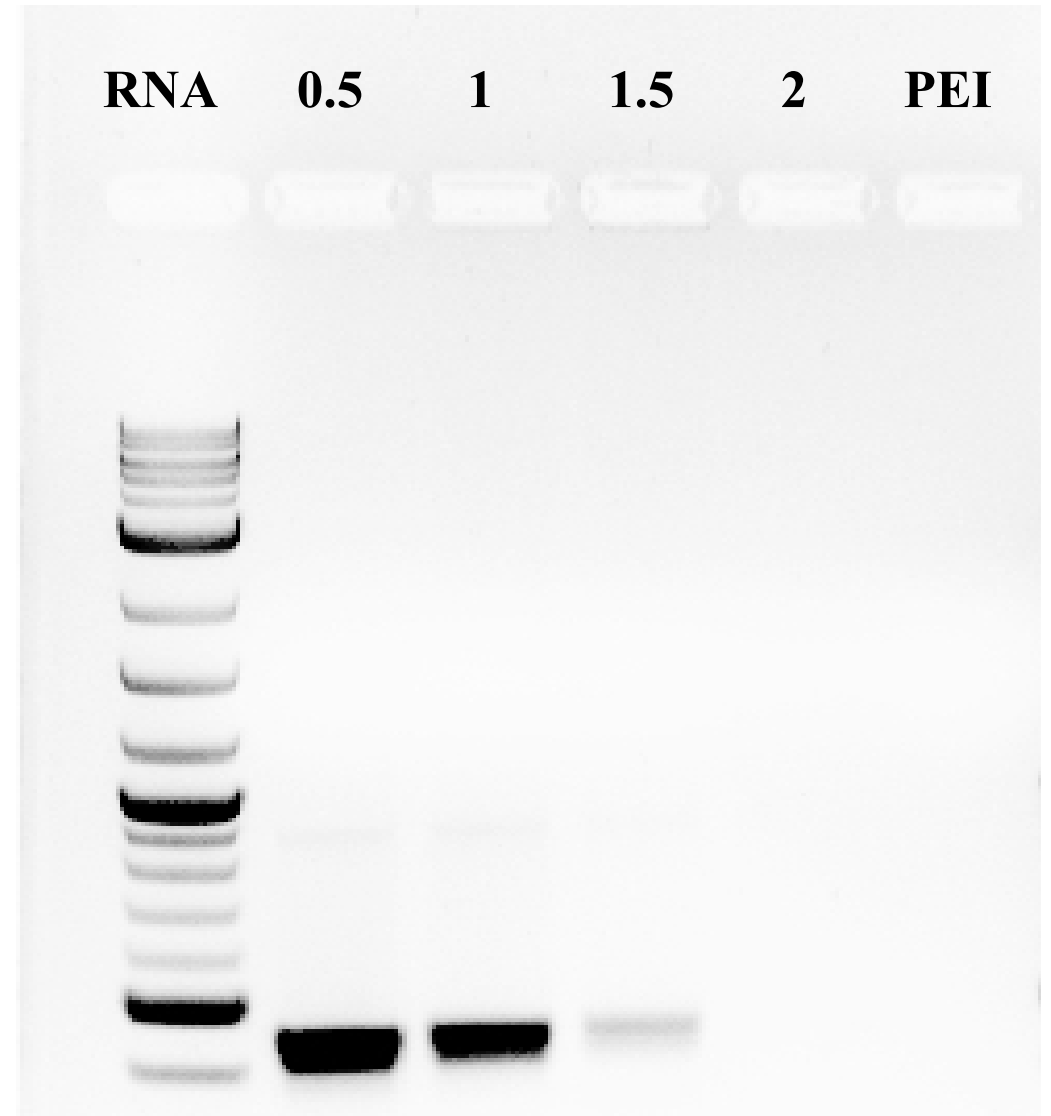

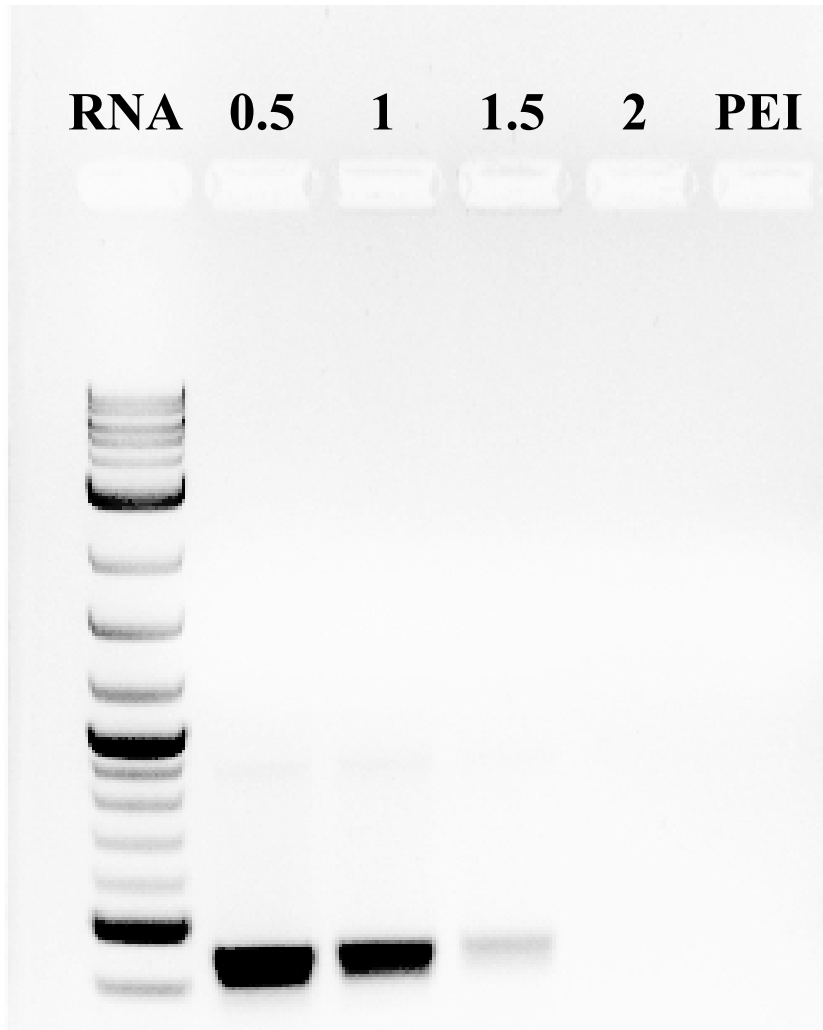

**a)**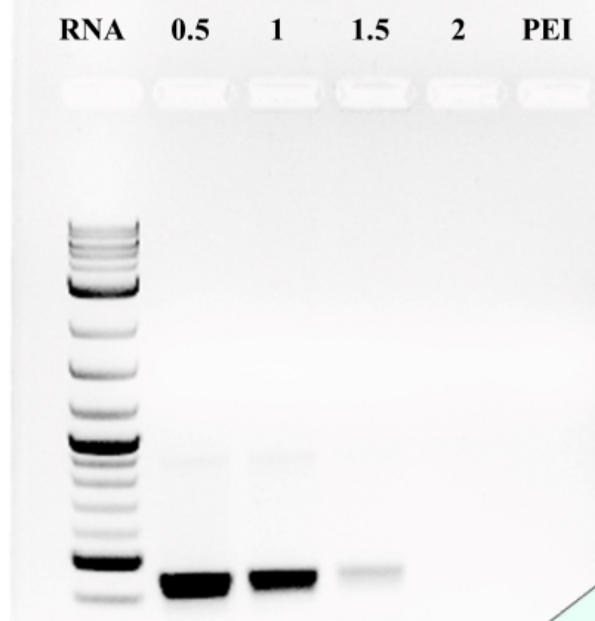**b)**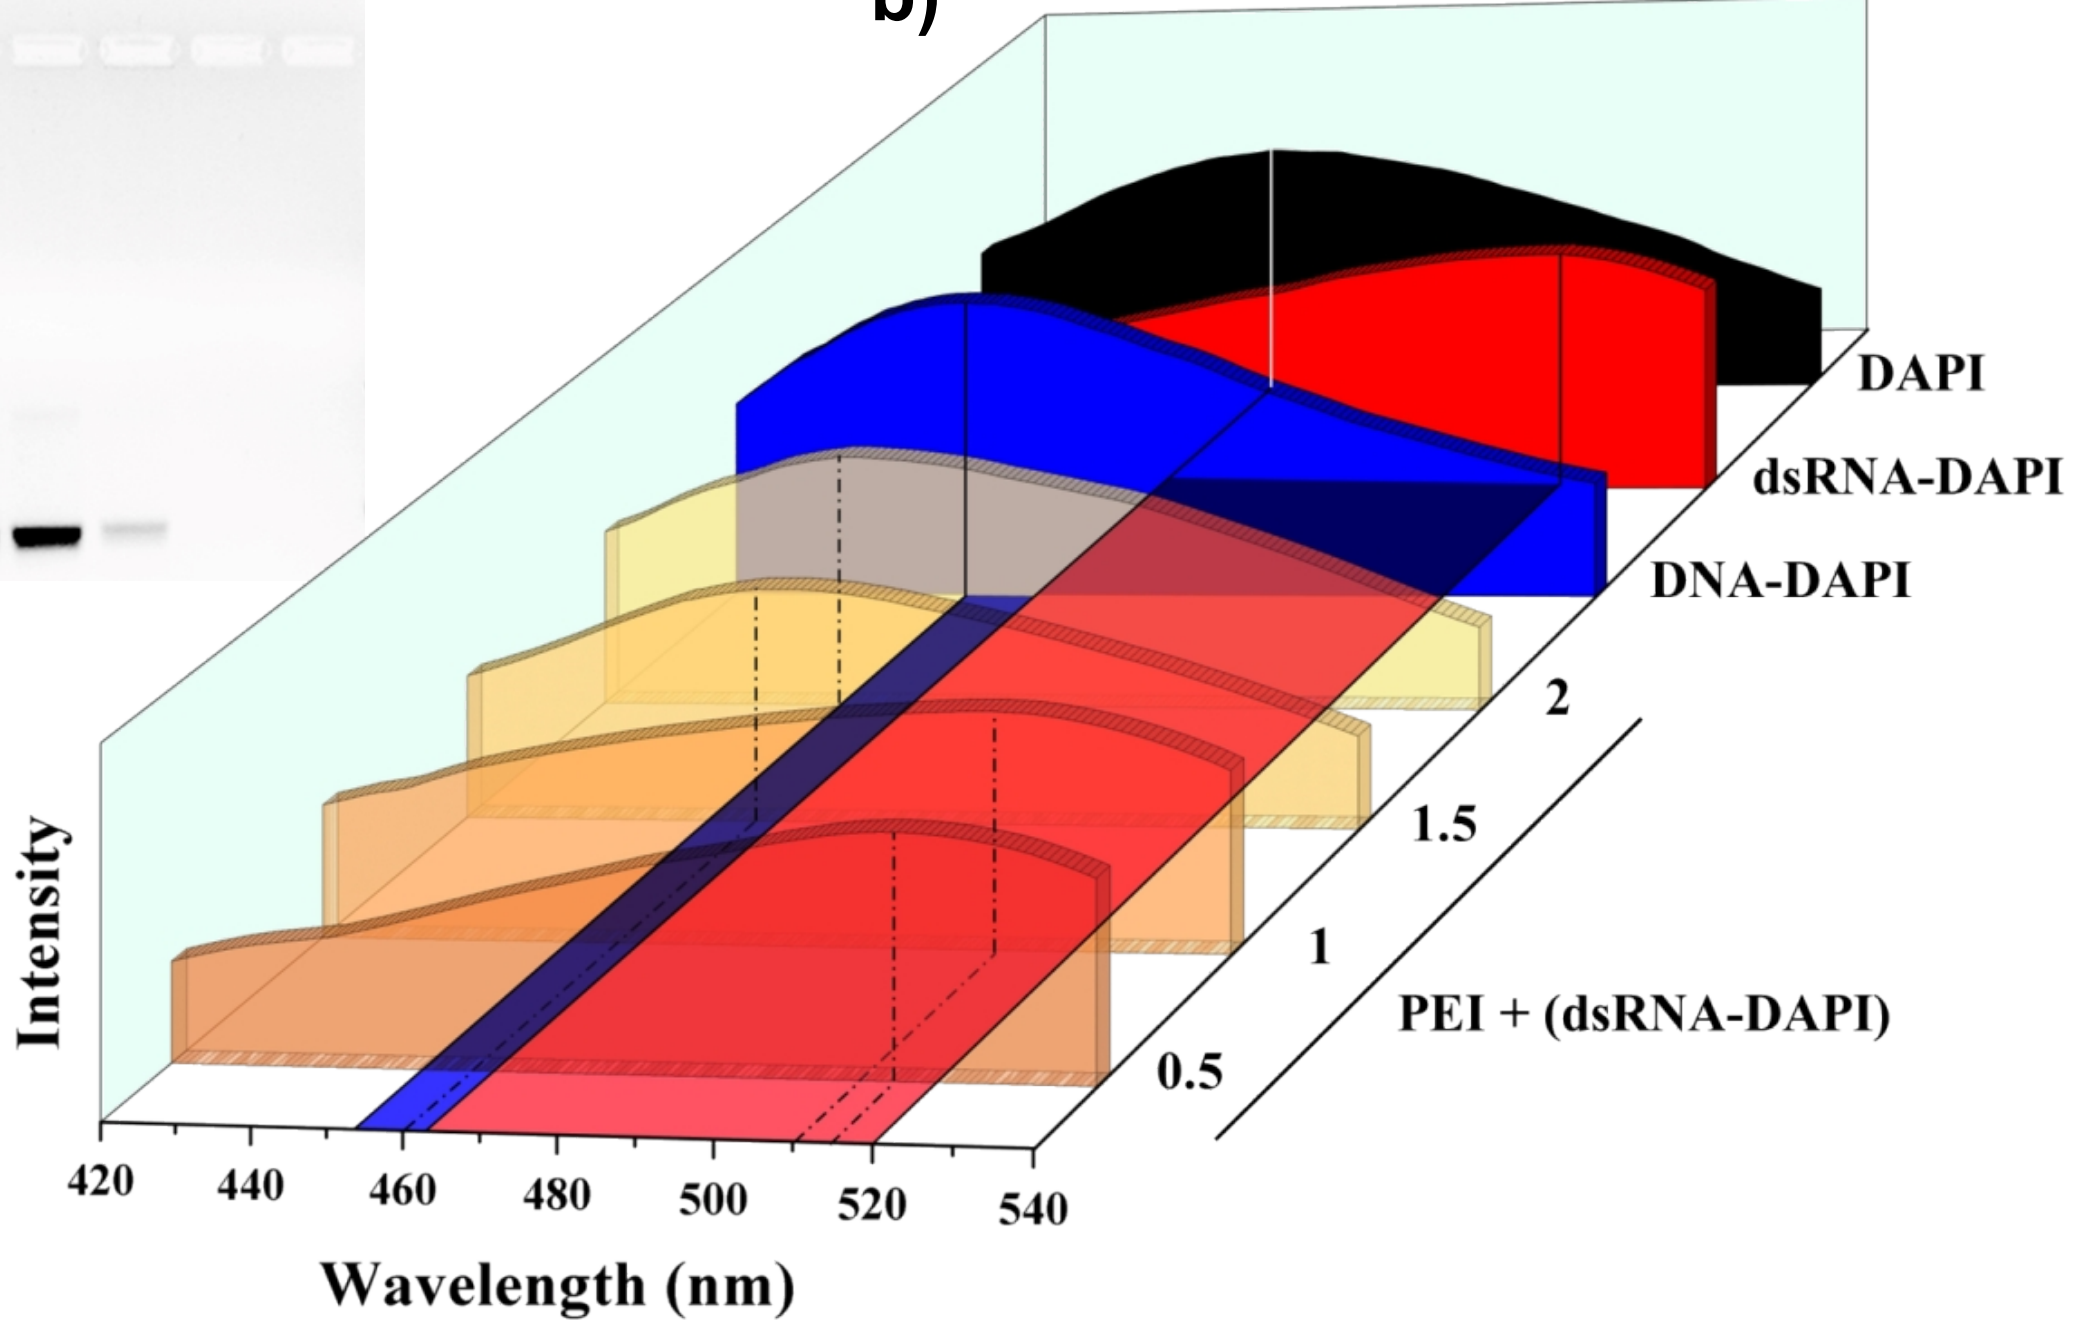

Supplement: d4tb01393j1.pdf [file d4tb01393j1.pdf]
